# Supplementary material for: Historical Background of Paleo Mega Lake of Rey
Source: Copernicus journal article supplement (doi:10.5194/hgss-2024-3), 2024-07-04
Supplement: Supplementary file [file hgss-2024-3-AC1-supplement.pdf]

Reviewer 1 response:

While thanking the reviewer for his careful opinion, the following points can be mentioned in connection with his comments:

- This article only refers to historical references and tries to present historical documents without prejudice and in an integrated manner. But in the article (Jarahi, 2021) the main topic of the lake and some of its evidence are presented.
- Regarding the climatic evidence, unfortunately, as the reviewer has pointed out, there is no high-resolution study in Central Iran. From Zaribar Lake (in the west) to Jazmurian (in the Southeast), there is a climate information gap. We are working on this issue with the help of two European and American universities, and the related article will be ready in a year. The mentioned article is specially dedicated to climate discussion.
- This article is the result of studying nearly 140 thousand pages of ancient Iranian history texts. From the old books of Avesta and Bondaheshn to contemporary history, they have all been reviewed. In the meantime, there are very limited mentions that have addressed the lake. The only document that talks about the water quality of the lake and its depth is related to one of the Qajar kings named Ain al-Dawlah (Persia, 1888). Other sources are not so accurate.
- As the honorable referee has mentioned, this is a very important issue and requires years of team effort. Over the past 16 years, extensive research has been done across the country to collect these documents. However, in a scientific work, there are always shortcomings that require further studies. As mentioned, we are trying to separate the documentation of PAMELA Lake and examine it with different scientific topics such as climatology, history, geology, archeology, and even seismology. Here only history is considered.
- A table of historical documents has been prepared separately for each period, which is added to the manuscript. According to the opinion of the reviewer, this table can help to understand the main topic of the article.

Sincerely yours,

Hadi Jarahi

Table 1 summarizes Iran's ancient historical documents, which refer to Lake PAMELA. This indicates a decrease in water levels from 2000 BC to 1888 AD.

| No. | Period     | Document                                                                                  | Lake name             | Area/Explanation                                                                                                     | Altitude       |
|-----|------------|-------------------------------------------------------------------------------------------|-----------------------|----------------------------------------------------------------------------------------------------------------------|----------------|
| 1   | 2000 BC    | Haghighat, 1962                                                                           | Saveh Lake            | Tahmurisdin Shah built the city of Semnan on the edge of Saveh lake                                                  | 970 m          |
| 2   | 330-648 BC | Avesta                                                                                    | Farakhkort Voerokashs | Alborz mountains in North of Iran, Shoshiagan in Kerman, Khurasgan in Isfahan, are located in the shoreline of Lake. | -              |
| 3   | 91 BC      | Qomi, 1934 and Strange, 1930                                                              | Saveh Lake            | A large lake from Rey to Saveh during the Parthian kingdom                                                           | 970 m          |
| 4   | 652-224 AC | Bondaheshn                                                                                | Farakhkort Voerokashs | Same as no.2                                                                                                         | -              |
| 5   | 439-457 AC | Kateb, 1458                                                                               | Saveh Lake            | Meybod, Bideh and Aghda Cities are located in the beach. The Bargin City was their port.                             | 970 m          |
| 6   | 550-570 AC | Qazvini, 1275                                                                             | Saveh Lake            | Saveh City was a port of Lake Saveh                                                                                  | 970 m          |
| 7   | 953-979 AC | Hedin, 1910<br>Siroux, 1949<br>Eghtedari, 2022<br>Qomi, 1934<br>Okhravi and Djamali, 2003 | Saveh Lake            | Jandagh in Isfahan and Torud in Damghan Cities are the port.                                                         | 800 m<br>800 m |
| 8   | 1888 AC    | Persia, 1888                                                                              | Saveh Lake            | Water level rising cased to Huzi Soltan and Namak Lake connect together                                              | 800 m          |
| 9   | -          | Gabriel, 1939<br>Pirniya and Afsar, 1991<br>Rajabi, 2004                                  | Saveh Lake            | Lighthouse, ports (Local names: Bargin, Parchin, Barjin, Barajin) are the remains of Lake                            | 800 m          |
