# Supplementary material for: Historical Background of Paleo Mega Lake of Rey
Source: Copernicus journal article supplement (doi:10.5194/hgss-2024-3), 2024-07-04
Supplement: Supplementary file [file hgss-2024-3-AC2-supplement.pdf]

## فصل اول

# نظر اجمالی بر راههای بازرگانی ایران

احتمالا ساکنان سرزمین ایران بسیار زود از حیوانات بارکش برای حمل و نقل کالای خود استفاده نمودند. بنا بر اطلاعاتی که از دوران پیش از تاریخ ایران در دست داریم ، اینطور بنظر میرسد که پس از اینکه دریاچه مرکزی ایران بتدریج خشک شد هوای آن نواحی هنوز آنقدر رطوبت داشت که مراغ وسیع اطراف خود را حفظ نماید و در نتیجه زندگی چوپانی فعالی در این نواحی بوجود آمد . احتمالا در این زمان مبادلات بازرگانی و در نتیجه تماس های انقافی قبیله ها با وساطت دوره کردها انجام میگرفت (۱) .

معمدا حتی پیش از انقلاب دوم عده ای از این مردم اینطور استنباط کرده بودند که حمل و نقل کالا و کارهای بازرگانی ممکن است عواید خوبی داشته باشد .

هنگامی که قسمت مهمی از این دریاچه ها خشک شد و بقیه آن نیز در حال خشک شدن بود ، در دهانه رودخانه هایی که وارد این دریاچه ها میشدند و در قسمت های پست دره ها اجتماعات کوچکی مستقر گردیدند که قسمتی از سال را بصورت شهرنشینی بسر میبردند و قسمت دیگر را مشغول گله چرانی میشدند و بعضی از آنها نیز کاملا شهرنشین شده بودند . ویرانه هایی که اکنون بصورت تپه های کوچکی در این نواحی دیده میشود از آثار همین اجتماعات اولیه انسان ها در سرزمین ایران است . این تپه ها که بیشتر در کنار جاده ها و کوره راهها قرار گرفته اند نشانه آنست که حتی از زمان های بسیار قدیم خط سیر انسان در این سرزمین تغییر نکرده است .

۱) احمد ابن الحسين الكاتب در تاريخ جديد يزد در اواخر قرن نهم هجري مینویسد: "..... پس از چندی يزد گرد ( ۴۴۸-۴۵۷ ميلادی ) پسر بهرام گور تيسفون را ترک کرده به ناحیه فارس رهسپار شد . وی دستور داد ساختمان های يزد را زودتر تمام کنند . در کنار او سرهنگی بود ( ميگویند سه سرهنگ بود ) و سومين آنان ميبد نام داشت . هر کدام شهری ساختند ، ميبد ، بيدار و اعدار . شهر اخير شهر گبرها نیز نامیده میشود . این سه شهر یا دهکده در کنار دریاچه ساوه قرار داشتند این دریاچه از ساوه تا همدان در فاصله یازده فرسنگ ( ۶۶ كيلومتر ) از يزد قرار داشت . در میان این دریاچه کوه تجن قرار گرفته بود . بندری بنام ده بر چین در کنار آن بود که امروز ده برگین نامیده میشود . ميگویند هنگام تولد پیغمبر اسلام این دریاچه خشک شد . آتش آتشکده ها نیز خاموش شد و طاق کسری در تيسفون شکست برداشت . ( ترجمه این مطلب بوسیله دکتر بهنام انجام گرفته است و نیز مراجعه کنید به کتاب های گوینو و دیولافواکه قبل " نام آنها گذشت ) .

و او را پسری بود یزدگرد نام کردند همنام پدر و یزد به اقطاع او داد و در وجه دایه و دبیرستان او نهاد. تا برین مدت بیست سال برآمد و شاهزاده یزدگرد چون سروروان بیالید و گلرخسارش در باغ دولت بشکفت. شاه بهرام گور همسر شایسته در کنار او کرد و بعد از مدتی شاهزاده از طیسفون باحرم و خاصگیان متوجه فارس شد و از آنجا به یزد آمد. و چون عمارت یزد نیم کار مانده بود بفرمود که بنایان دیگر بار به عمارت مشغول شدند و از همه | مملکت خانه کوچ بیاوردند و در یزد مقیم کردند. [۳۴] و دو سرهنگ همراه داشت: یکی را نام بیدار و دیگری را نام عقدار. و گویند سه سرهنگ بودند، سوم را نام مییدار. | و ایشان هر یکی دهی بساختند. بیدار «بیده» بساخت و عقدار «عقدا» بساخت که به «ده گبران» مشهورست و مییدار «میید» بساخت. و این هر سه ده بر کنار دریای ساوه بود، و از ساوه تا همدان و تا ده فرسنگی یزد این دریا بود و چند کوه در میان این دریا بود و بندر او «بارجین» بود که امروز او را «بارگین» می خوانند. و از معجزات مولود حضرت پیغمبر آخر الزمان صلی الله علیه و آله وسلم یکی آن بود که در آن شب آب این دریا خشک شد و آتش تمام آتشکدها بمرد و طاق ایوان کسری بشکست، چنانکه گفته اند:

شعر

|                           |                        |
|---------------------------|------------------------|
| آن شب که ز مادر او جدا شد | عالم همه از بلا رها شد |
| هم آتش تیز فارس مرده      | هم آب سیاه ساوه برده   |

### دریاچه ساوه

بین علی آباد و دریاچه مزبور دو فرسنگ شود و دریاچه ساوه در شب ولادت حضرت رسالت مآب محمد مصطفی صلی الله علیه و آله و سلم دفعته خشکیده و در آن فرخنده شب چند حادثه در عالم اتفاق افتاده چنانچه «صباحی بیدگلی» فرماید:

نم رود سماوه، خشکی دریاچه ساوه      خمود نارآتشخاله، کسر گنبد کسری  
رود سماوه دریای نجف اشرف است و دیگری فوران دریاچه ساوه است و دریای نجف در چند سال قبل خشکیده و حال در موضع آن ابنیه و باغات زیاد ساخته اند و دریاچه ساوه در سال هزار و سیصد و چهار آب آورده و حال می گویند ممکن است کشتی بر آن عبور و مرور کند و ماهی های بسیار بزرگ در آن دیده شوند. تا ببینیم باز از خیام غیب بعرضه شهود که قدم گذارده است.

تسعیر ارزاق در علی آباد نان يك من تبریز یکمزار و پنیر شش هزار و جو هشتصد دینار و گاه سیصد دینار و هیزم هفتصد دینار و خربزه پانصد دینار و انگور یکمزار و ماست یکمزار و دو بیست دینار و مرغ يك قطعه دو هزار و پنج شاهی بود.

(Persia, 1888)

*On the New Lake between Kōm and Teherân.*

By H.M. The SHÂH OF PERSIA.

(From the Teherân gazette 'Irân,' Nos. 655 and 656, 10th and 19th May, 1888 :  
translated and annotated by General A. HOUTUM-SCHINDLER.)

Map, p. 676.

THE lake which has appeared between Teherân and Kōm is the lake of Sâvah, of which mention is made in history, and which dried up about 1357 years ago, on the day the prophet—may the blessings of God be upon him and his posterity!—was born. It reappeared about six years ago.\*

\* De Sacy fixed the date of the prophet Muhammed's birth as the 20th April, A.D. 571, but added, "En vain chercherait-on à déterminer l'époque de la naissance de Mahomet d'une manière qui ne laissât subsister aucune incertitude." Sprenger follows him, but considers the date only as a conventional one, generally accepted during the first half of the first century of the Hijrah. Muir accepts, as an approximation, the date

Going toward Kom from Manzarieh one can plainly see that the whole five farsakhs of road one passes over from Manzarieh to the, fields one farsakh from Kom were formerly covered by a lake, *This part of the country was known in olden times as "chal i deryâ" (the bed of the sea), and is so called now. Several sea-shells were picked up there, and probably in future ages this district will once again become covered by a lake, as it formerly was*<sup>†</sup>. One farsakh from Manzarieh the road to Kom passes the Savah river, which flows from west to east, bends to the north below Pul i dellak, and then flows into the lake we have described. Here where the road passes the river a noble bridge has been built at the expense of Government. The Amin i Sultan

در نقاط مختلف کرانه کویر تراسهایی به چشم می خورد که نشانه خط ساحلی یک دریاچه قدیمی است. این تراسها درحین بزرگترین دوره گسترش کفه کویر، که اکنون بکلی خشک شده، به وجود آمده است.

نخستین محقق دوران اخیر که با دید علمی به کویر پرداخته «اف. آ. بوهزه<sup>۳۰</sup>»، گیاه شناس روسی است. وی در آوریل سال ۱۸۴۹ در فصل مناسب سفرش را آغاز کرد و در جهت خط استوا با عبور از «دامغان» و «جندق»، کویر بزرگ را پشت سر گذاشت. در آن زمان به نظر می رسید که غالباً با اسب که خطر کمتری داشته است از باتلاقیهای نمک عبور کرده باشند، «بوهزه» نیز در کویر بقایایی از دریاها، محصور و مسدود دوران اولیه را دیده است.

ما محل اتراق شماره ۵۲ در «ترود» را با رغبت ترک گفتیم. برنامه بعدی ما قسمتی در کویر و قسمت دیگر درمرزهای آن صورت می گرفت. قسمت باتلاق نمک که اکنون در شرق ما گسترده شده بود، طبق گفته آشنایان با منطقه، به نظر می رسید که برای انسان و برای حیوان قابل عبور نیست. جریانات متعدد سرازیر شده از کوه که از شمال و شرق به کویر منتهی می شدند، آب خود را همواره به کویر می ریختند. خشک شدن بقایای دریای گذشته در این جا به کندی صورت می گرفت.

#### کویر بزرگ/۴۹

تردید امیز است. ما سهم بسیار مهمی از شناخت خودمان در باره کویر را مدیون محقق انگلیسی «اچ. بی. وگان» هستیم. این محقق خستگی ناپذیر کویر، همواره به سوی مناطق خشک پرت افتاده شرق ایران، یعنی نواحی نزدیک «خراسان» کشیده شده است. او در سالهای ۱۸۸۸، ۱۸۹۰ و ۱۸۹۱ از راههای مختلف در سفرهای متعدد، این مناطق را زیر پا گذاشته و در این میان از موقعیتهای مطلوب برای تعیین مرزهای باتلاق نمک استفاده کرده است. او چندین بار نیز به سطح کویر بزرگ رفته است و در سفر خود از «خور» به «طیس»، مسیر کرانه جنوبی خلیج شرقی کویر خراسان را از همان راهی که «سی. ام. مک گرگور<sup>۳۳</sup>» در شانزده سال پیش رفته بود، پشت سر گذاشته و به همراه «سی. اف. بیدولف<sup>۳۴</sup>» از مسیله عبور کرده است. کوشش برای تحقیق در «بندگتل» از سمت شمال بی نتیجه ماند. اطلاعات مختصر در باره دو رودخانه کال مورا و «کال لدا<sup>۳۵</sup>» را که از قرار معلوم به یک دریاچه بزرگ می ریزند، مدیون او هستیم. وی از داستانهایی نقل قول می کند که از کویر در آنها به عنوان دریایی با کشتیها، بندرگاهها، برجهای فانوس دریایی و غیره یاد شده است.

## راه‌های پیوندی :

در میان استانهای بزرگ پارس خراسان کرمان و شبستان و کوهستان و اصفهان بیابانهای پهناوری است که گهگاه در گوشه و کنار آن آبادیهای کوچک بچشم میخورد . اگرچه تا سده‌های چهارم و پنجم هجری مانند امروز یکسره خشک و بی‌آب و گیاه نبوده گاهی دریاچه ساوه گسترش می‌یافته و با پیوستن بشورابها و دریاچه‌های نمک و پارگین‌ها از ورامین تا نائین و میبد کشیده میشده و درختان تاغ و جفته و گز و بوبته‌های خار آدور تا اندازه‌ای از برخاستن ریک و روان شدن آن پیش‌گیری میکرده است با اینهمه هرگز شهر و آبادی قابل توجهی که بتواند مردمی را در خود گرد آورد در میان دشت برپا نشده تنها بر کران این پهله چند شهر کوچک چون بندری بر کناره دریای ریک خودنمائی میکرده است .

۱۱۰

بر فراز برخی از میلها و مناره‌ها در شب و روزهای مه‌آلود و طوفانی و تاریک مانند برجهای دریائی آتش نیز می‌افروختند و آثار آتش در میلهای اخنجان و رادکان در جای مناسب یعنی میان دو گنبد مؤید این نظراست و برج نورآباد ممسنی فارس (که آن نیز در کنار شاهراه فارس بوده) با فروغ خود رهگذران را راهنمائی میکرده است و هنوز که هنوز است روشنی‌آن فراموش نشده تا آنجا که نام خود را بآبادی نورآباد داده است .

۱۴۴

در جای دیگر درباره میلهای دریائی سخن رفت و برجهایی را که بنام خشابه و خشبات معروف بوده (و گمان کرده‌اند از خشب تازی بمعنای چوب گرفته شده با اینکه هر دو واژه گویشهای ایرانی و بمعنای مانوردهنده و گنبد و بنای رخشنده است) . نظیر این برجاها در کنار پارگین‌ها (پارچین) و دریاچه‌های دوون نجد ایران نیز هست و از آنجمله برج پارچین و ورامین است که روزگاری در کنار پارگین متصل به دریاچه ساوه برپای شده است .

۱۵۵

علت بنای اولیه  
سمنان (۳)

گویند در حدود دوهزارسال قبل از میلاد مسیح طهمورث دیوبند بر اریکه جهانبانی نشسته و ایران را نیز از هر حیث دایر ساخته بود طهمورث در اوایل سلطنت خود برای رسیدگی بامور کشور عازم سرزمین پارت (خراسان) گردید و در حین مسافرت از محل سمنان که در آن زمان بصورت جنگل و ساحل دریا بوده است دیدن کرد . سمنان در آن زمان جلگه وسیع و خوش منظره ای بود که نظیر آن نقطه را نقاط مازندران و گیلان . حالیه باید دانست در آن روزگار در هشت فرسنگی جنوب سمنان دریای ساوه موج میزد و رودها از هر سو بطرف دریا روان بودند، سراسر سواحل این دریا پر از سبزه و درختان جنگلی بود و از آواز بلبل و هزارستان ثانی باغ جنان شده بود طهمورث وقتی که باین سرزمین رسید خرم و شادان گشته چند روزی توقف نمود.

اکثر مؤلفین کتب تاریخی و جغرافیائی طهمورث را بانی شهر سمنان دانسته اند . و از طرفی بامراجعه به بخش تشکیل فلات ایران در همین کتاب ثابت میشود که در جای کویر حالیه ایران دریای محصوره بوده است که رفته رفته آب آن تبخیر و خشک شده است. پس بامر طهمورث شهری در این مکان بنا گردید و نخستین



(Hedin, 1910)

دگرگونیهی آب و هوا در ایران پس از عصر یخبندان / ۵۹۷

قسمت‌ها رسیده دوره‌ای میان رودخانه‌ای با رودهای کوتاه‌تر و دریاچه‌های کوچک شده از هم دیگر جدا شده‌اند. همه چیز حاکی از آن است، که در زمانهای بسیار پیش در مقایسه با امروز بارشهای زیادتر و پرنتیجه‌تری وجود داشته است. حتی ارقام تاریخی و افسانه‌ها و نقل قولهایی که به ما رسیده است با این ادعا می‌خواند. ظاهراً آخرین دوره آبهای زیاد و پرنتیجه زمان اسکندر - ۳۰۰ سال پیش از میلاد - و استخری ۹۰۰ سال پس از میلاد - را شامل می‌شود. ظاهراً حد فاصل بین پرآبی بزرگ در زمانهای بسیار کهن و خشکی عهد جدید حد فاصل بین آخرین دوره رودخانه‌ای و دوره میان رودخانه‌ای جدید است. هونتینگتون به این سؤال، که آیا دلیل مستقیمی که حاکی از دگرگون شدن آب و هوا در عصر تاریخ باشد وجود دارد، جواب مثبت می‌دهد. چون اسکندر و استخری ثابت می‌کنند، که آب و هوای امروز خشک‌تر است.

تدارکات سفر کویر / ۳۰۵

خود ایرانیها در جندق این احساس را دارند، که در ساحل دریا زندگی می‌کنند. بنا به روایت، کویر در زمان انوشیروان، یعنی ۱۳۵۰ سال پیش، دریاچه بزرگی بوده است. در سمت غربی این دریاچه رود بزرگی به نام قاراچای، که از همدان و ساوه می‌آمد، به دریا می‌پیوست.

دگرگونیهی آب و هوا در ایران پس از عصر یخبندان / ۶۰۹

جالب توجه است، که بدانیم دهکده بونس همان نامی را دارد که بونس پیغمبر و این پیغمبر بنا به افسانه‌ای که در این ده تعریف می‌شود در این ده از دهان نهنگ افتاده است و هم چنین دروازه جندق از آوار یک کشتی ساخته شده است که در دریای کویر رفت و آمد داشته است و حسینان و دیگر روستاهای حاشیه کویر روزگاری بندر بوده‌اند.

فرورفتگی دریاچه‌ای قدیمی زیبا و منظمی هم داریم به نام فرورفتگی طبس . این فرورفتگی در عصر یخبندان دریاچه مهمی را شامل می‌شده است . این امر از تراس دو طبقه‌ای که در راه پرواده - همواره در سمت چپ راه - قرار دارد به وضوح مشهود است . این تراسها مانند ردیفی از تپه‌های هم ارتفاع پیوسته به چشم می‌خورند و جبهه‌ای گرد دارند و به وسیله برشها و شیارهای فرسایشی از یک دیگر جدا شده‌اند . من در گوداترین قسمت این فرورفتگی دریاچه نمک کوچک و کم عمقی یافتم به نام «آب کویر» . این دریاچه آخرین بازمانده دریاچه عصر یخبندان است .

در این که فرورفتگی طشت دشت لوت هم در دوره‌ای با آب و هوای مرطوب بستر یک دریاچه بوده است بیشتر به این خاطر تردید نداریم ، که این فرورفتگی در مرز سیستان قرار دارد و فقط با سیستم کوهستانی پستی از این استان جدا می‌شود . عللی که هاهون را به صورت بسیار گودتر و گسترده‌تری در آورده‌اند بایستی در دشت لوت هم که گودالی بسته است و از کوهستانهای اطراف خود رودخانه‌های زیادی را به طرف خود می‌کشد نقشی داشته بوده باشند . در راه حاشیه شمالی لوت از بسترهای زیادی می‌گذریم ، که وسعت آنها متناسب با بارشهای امروزی این سرزمین نیست و به همین ترتیب همه گودالهای بی‌رودخانه ایران ، که بعضی از آنها هنوز هم دریاچه‌ای موسمی و یا حوضچه‌های نمک به وجود می‌آورند ، روزگاری بستر دریاچه‌های بزرگ و کوچکی بوده‌اند . بدون تردید بیشتر این دریاچه‌ها از فراز بلندیهایی که فقط کمی از سطح کویر بلندتر هستند با همدیگر در ارتباط بوده‌اند .

در عوض تردیدی نیست ، که تراس رسوبی کاملاً مشخص طرود یکی از کرانه‌های پیشین دریاچه‌ای بوده است ، که در این جا قرار داشته است . فقط یک دریاچه بزرگ ، که برای مدتی طولانی حوزه معین را اشغال کرده است می‌تواند یک چنین نشانه مشخص و واضحی از خود برجای گذاشته باشد . بدون شك رسوبهایی از این

- Afshar, I., 1978. New History of Yazd. Publications of Farhang-e Iran Zamin, Tehran, Iran (in Persian), 320 pp.
- Eghtedari, A., 2022. Sadid Alsaltaneh Travel Book. Sokhan, Tehran, Iran, 739 pp.
- Gabriel, A., 1939. Aus den Einsamkeiten Irans. Strecker und Schroder Verlag, Stuttgart, Germany 186 pp.
- Haghighat, A., 1962. The History of Semnan. Etelaat Publication, Tehran, Iran (in Persian), 236 pp.
- Hedin, S.A., 1910. Overland to India. Macmillan and Company, limited.
- Persia, S.o., 1888. On the New Lake between Kōm and Teherân. Proceedings of the Royal Geographical Society and Monthly Record of Geography, 10(10): 624-632.
- Pirniya, K. and Afsar, K., 1991. Road and Robats. National Antiquities Protection Organization of Iran, Tehran, Iran, 220 pp.
- Siroux, M., 194 . Caravansérails d'Iran et petites constructions routières. l'Institut français d'archéologie orientale.
